# Supplementary material for: Layered hybrid lead perovskite single crystals: phase transformations and tunable optical properties
Source: Royal Society of Chemistry journal article supplement (doi:10.1039/d0ce00753f), 2020-01-01
Supplement: d0ce00753f1.pdf [file d0ce00753f1.pdf]

## **Electronic Supplementary Information for**

### **Layered Hybrid Lead Perovskite Single Crystals: Phase Transformations and Tunable Optical Properties**

Jiewu Song,<sup>a</sup> Yangyang Dang,<sup>\*abc</sup> Xiao long Liu,<sup>a</sup> and Xutang Tao<sup>\*a</sup>

<sup>a</sup> State Key Laboratory of Crystal Materials & Institute of Crystal Materials, Shandong University, No. 27 Shanda South Road, Jinan, 250100, P. R. China.

<sup>b</sup> School of Physics and Physical Engineering, Shandong Provincial Key Laboratory of Laser Polarization and Information Technology, Qufu Normal University, 273165, Qufu, P. R. China.

<sup>c</sup> Tianjin Key Laboratory of Molecular Optoelectronic Sciences & Department of Chemistry, School of Sciences, & Collaborative Innovation Center of Chemical Science and Engineering, Tianjin University, Tianjin, 300072, P. R. China.

#### **Corresponding Authors:**

E-mail: yeung\_dang@tju.edu.cn; txt@sdu.edu.cn

## Experimental Section

**Fig. S1** Fluorescent photo of the monoclinic  $\text{PEA}_2\text{PbI}_4$  single crystal covered on the surface of triclinic  $\text{PEA}_2\text{PbI}_4$  single crystal under UV-445 nm irradiation.

**Fig. S2** Green emissive  $\text{PEA}_2\text{PbI}_4$  single crystal obtained by the phase transformation processes induced by  $\text{CH}_3\text{OH}$  solvent.

**Fig. S3** Red emissive  $\text{PEA}_2\text{PbI}_4$  single crystal obtained by the phase transformation processes.

**Fig. S4** Calculated and powder XRD patterns of  $\text{PEA}_2\text{MA}_{n-1}\text{Pb}_n\text{I}_{3n+1}$  ( $n = 1\sim 3$ ).

**Fig. S5** Thermal properties (TGA/DSC) of  $\text{PEA}_2\text{MA}_{n-1}\text{Pb}_n\text{I}_{3n+1}$  ( $n = 1\sim 3$ ).

**Fig. S6** UV-vis spectra and band gap of  $\text{PEA}_2\text{MA}_{n-1}\text{Pb}_n\text{I}_{3n+1}$  ( $n = 1\sim 3$ ).

**Fig. S7** PL decay lifetime of  $\text{PEA}_2\text{PbI}_4$  and MA:  $\text{PEA}_2\text{PbI}_4$  single crystals under UV-445 nm irradiations and emission at 520 nm

**Table. S1** Crystal data and structure refinements for  $\text{PEA}_2\text{MA}_{n-1}\text{Pb}_n\text{I}_{3n+1}$  ( $n = 1\sim 3$ ).

## Experimental Section

**Single-crystal X-ray diffraction and Powder X-ray diffraction studies.** Single-crystal X-ray diffraction and powder X-ray diffraction measurements were depicted elsewhere.<sup>1</sup>

**UV-vis-NIR diffuse reflectance spectra measurements.** UV-vis-NIR diffuse reflectance spectroscopy was carried out using a Varian Cary 5000 spectrophotometer equipped with an integrating sphere over the spectral range 200-1200 nm. The  $\text{PEA}_2\text{MA}_{n-1}\text{Pb}_n\text{I}_{3n+1}$  ( $n = 1\sim 3$ ) single crystals were dried and grinded into powders. A  $\text{BaSO}_4$  plate was used as the standard (100% reflectance). The absorption spectrum was calculated from the reflectance spectrum using the Kubelka-Munk function:  $\alpha/S = (1-R)^2/(2R)$ ,<sup>2</sup> where  $\alpha$  is the absorption coefficient,  $S$  is the scattering coefficient, and  $R$  is the reflectance.

**Thermogravimetric analysis Measurements.** Differential scanning calorimetry (DSC) and thermogravimetric analysis (TGA) were carried out using a TGA/DSC1/1600HT analyzer (METTLER TOLEDO Instruments). The  $\text{PEA}_2\text{MA}_{n-1}\text{Pb}_n\text{I}_{3n+1}$  ( $n = 1\sim 3$ ) sample were placed in a platinum crucible, and heated at a rate of  $10\text{ }^\circ\text{C min}^{-1}$  from room temperature to  $800\text{ }^\circ\text{C}$  under flowing nitrogen gas.

**PL spectra and PL decay time measurements.** The microarea PL images were collected using a Nikon fluorescence microscope and the PL spectra of  $\text{PEA}_2\text{MA}_{n-1}\text{Pb}_n\text{I}_{3n+1}$  ( $n = 1\sim 3$ ) were gathered with a Carl Zeiss Jena LSM 780 confocal laser fluorescence microscope. The decay times of as-prepared microcrystals of  $\text{PEA}_2\text{MA}_{n-1}\text{Pb}_n\text{I}_{3n+1}$  ( $n = 1\sim 3$ ) were measured at room temperature under 445 nm wavelength irradiations.

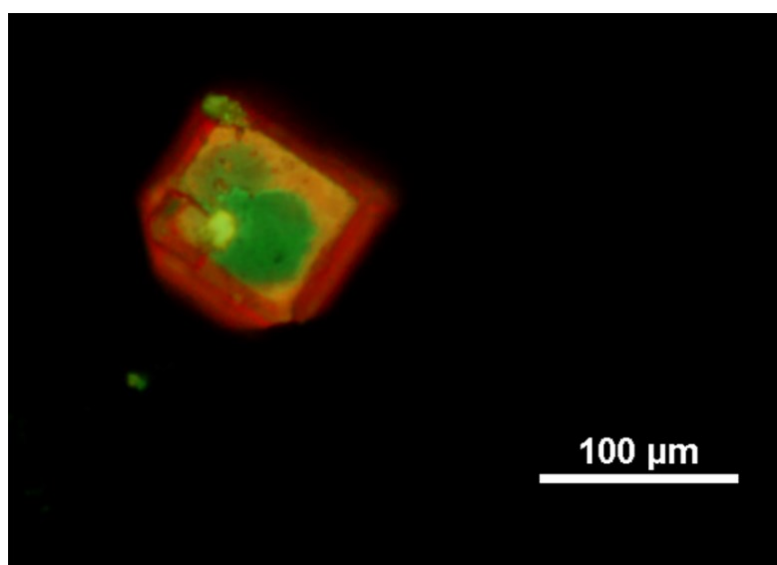

**Fig. S1** Fluorescence photo of the monoclinic PEA<sub>2</sub>PbI<sub>4</sub> single crystal covered on the surface of triclinic PEA<sub>2</sub>PbI<sub>4</sub> single crystal under UV-445 nm irradiation.

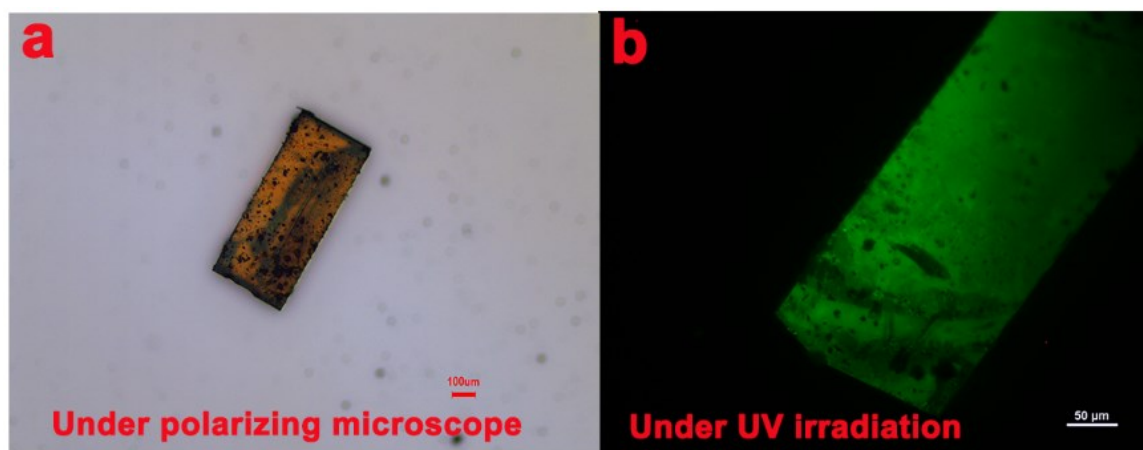

**Fig. S2** Green emissive PEA<sub>2</sub>PbI<sub>4</sub> single crystal obtained by the phase transformation processes induced by CH<sub>3</sub>OH solvent. (a) PEA<sub>2</sub>PbI<sub>4</sub> single crystal under polarizing microscope; (b) Green fluorescence of PEA<sub>2</sub>PbI<sub>4</sub> single crystal under UV-445 nm irradiation.

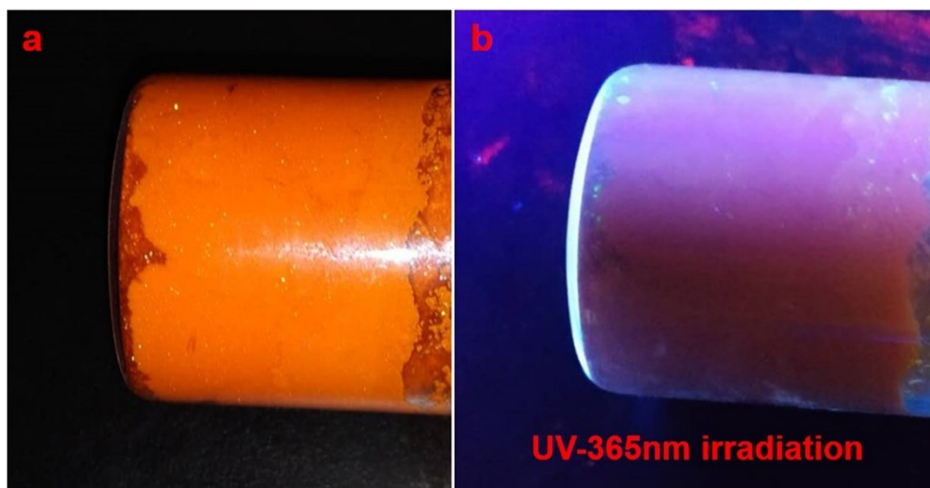

**Fig. S3** Red emissive  $\text{PEA}_2\text{PbI}_4$  single crystal obtained by the phase transformation processes. (a)  $\text{PEA}_2\text{PbI}_4$  single crystal under ordinary light; (b) Red fluorescence of  $\text{PEA}_2\text{PbI}_4$  single crystal under UV-365 nm irradiation.

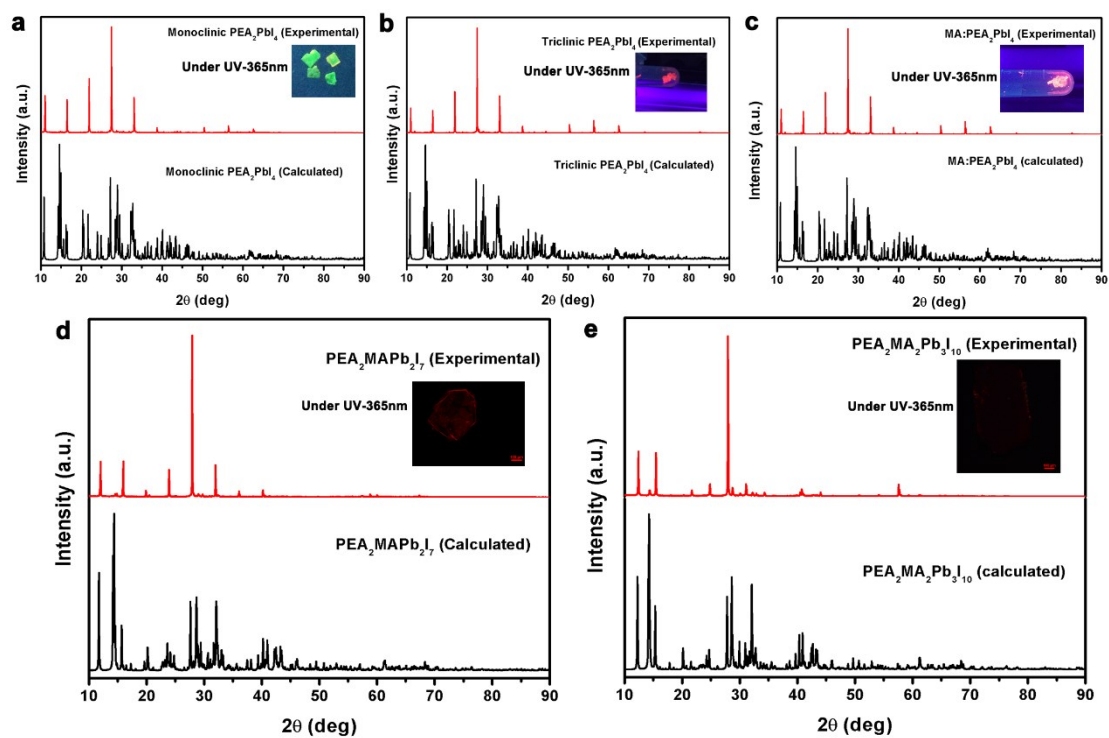

**Fig. S4** Calculated and powder XRD patterns of  $\text{PEA}_2\text{MA}_{n-1}\text{Pb}_n\text{I}_{3n+1}$  ( $n=1\sim 3$ )

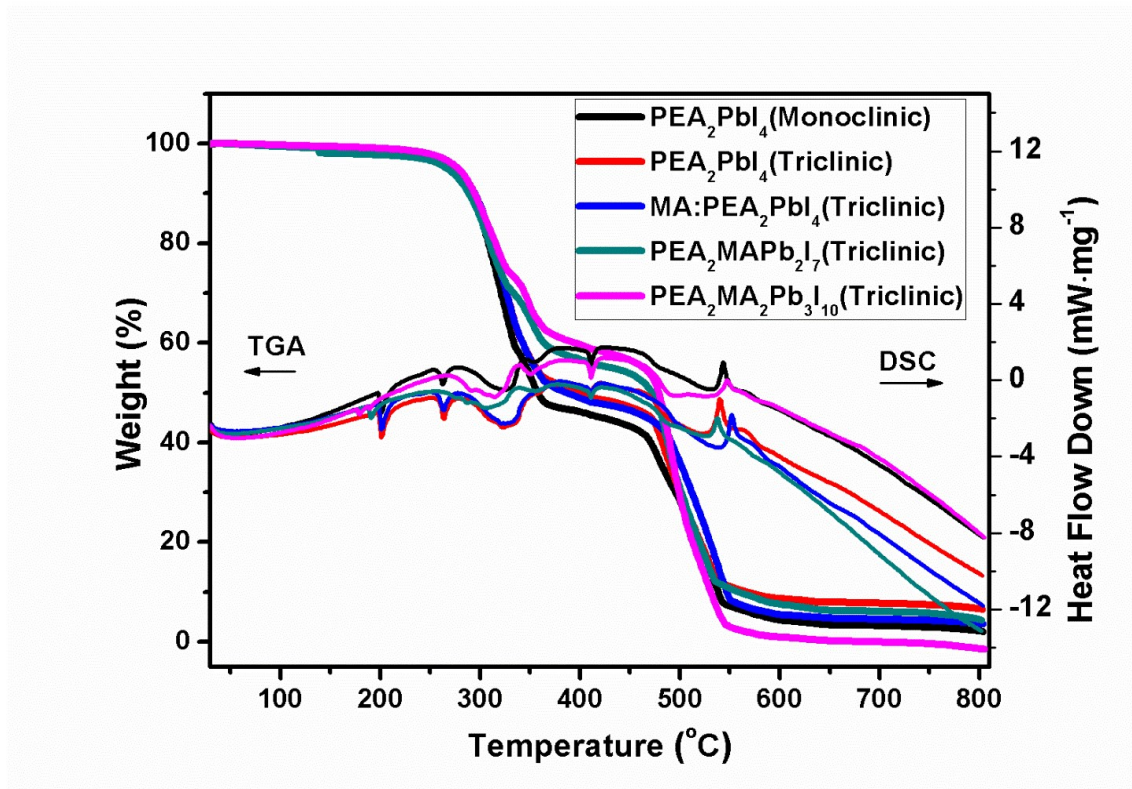

**Fig. S5** Thermal properties (TGA/DSC) of  $\text{PEA}_2\text{MA}_{n-1}\text{Pb}_n\text{I}_{3n+1}$  ( $n = 1\sim 3$ )

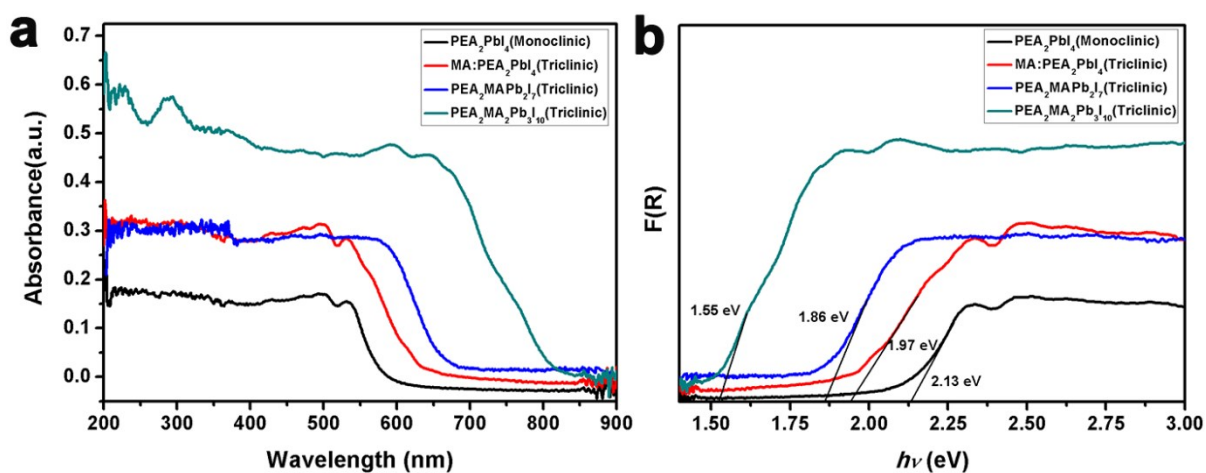

**Fig. S6** UV-vis spectra and band gap of  $\text{PEA}_2\text{MA}_{n-1}\text{Pb}_n\text{I}_{3n+1}$  ( $n = 1\sim 3$ ). (a)

Tunable UV-vis spectra of  $\text{PEA}_2\text{MA}_{n-1}\text{Pb}_n\text{I}_{3n+1}$  ( $n = 1\sim 3$ ); (b) Tunable band gap of  $\text{PEA}_2\text{MA}_{n-1}\text{Pb}_n\text{I}_{3n+1}$  ( $n = 1\sim 3$ ) from 2.13 to 1.55 eV.

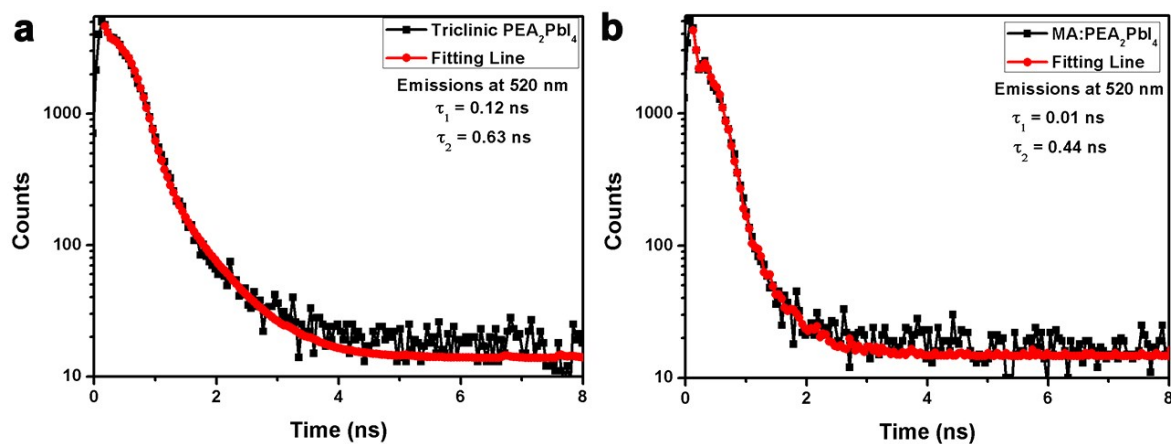

**Fig. S7** PL decay lifetime of Triclinic  $\text{PEA}_2\text{PbI}_4$  and MA:  $\text{PEA}_2\text{PbI}_4$  under 445 nm irradiations and emission at 520 nm.

**Table. S1** Crystal data and structure refinements for  $\text{PEA}_2\text{MA}_{n-1}\text{Pb}_n\text{I}_{3n+1}$  ( $n=1\sim 3$ )

| Empirical formula                                | $\text{C}_{16}\text{H}_{24}\text{N}_2\text{PbI}_4$ |                  | $\text{C}_{16}\text{H}_{24}\text{N}_2\text{PbI}_4$ | $\text{C}_{17}\text{H}_{30}\text{N}_3\text{Pb}_2\text{I}_7$ | $\text{C}_{18}\text{H}_{36}\text{N}_4\text{Pb}_3\text{I}_{10}$ |
|--------------------------------------------------|----------------------------------------------------|------------------|----------------------------------------------------|-------------------------------------------------------------|----------------------------------------------------------------|
| Formula weight/ $\text{g}\cdot\text{mol}^{-1}$   | 959.16                                             |                  | 959.16                                             | 1579.12                                                     | 2199.08                                                        |
| Temperature/K                                    |                                                    |                  | 296(2)                                             |                                                             |                                                                |
| Wavelength/ $\text{\AA}$                         |                                                    |                  | 0.71073                                            |                                                             |                                                                |
| Crystal color                                    | Orangish                                           | Orangish         | Reddish                                            | Brownish                                                    | Blackish                                                       |
| Crystal system                                   | Monoclinic                                         | Triclinic        | Triclinic                                          | Triclinic                                                   | Triclinic                                                      |
| Space group                                      | $C2/m$ (no.12)                                     | $P-1$ (no. 2)    | $P-1$ (no. 2)                                      | $P-1$ (no. 2)                                               | $P-1$ (no. 2)                                                  |
| $a/\text{\AA}$                                   | 32.824(6)                                          | 8.7350(16)       | 8.7497(8)                                          | 8.8092(5)                                                   | 8.8201(14)                                                     |
| $b/\text{\AA}$                                   | 6.1669(11)                                         | 8.7359(16)       | 8.7510(8)                                          | 8.8168(4)                                                   | 8.8198(14)                                                     |
| $c/\text{\AA}$                                   | 6.2114(11)                                         | 16.673(3)        | 16.6830(15)                                        | 22.8196(12)                                                 | 29.038(5)                                                      |
| $\alpha/^\circ$                                  | 90                                                 | 99.694(5)        | 99.7643(10)                                        | 97.072(4)                                                   | 93.198(2)                                                      |
| $\beta/^\circ$                                   | 93.205(2)                                          | 95.220(6)        | 95.2258(10)                                        | 93.983(4)                                                   | 95.495(2)                                                      |
| $\gamma/^\circ$                                  | 90                                                 | 90.393(5)        | 90.3394(10)                                        | 90.199(4)                                                   | 90.123(2)                                                      |
| Volume/ $\text{\AA}^{-3}$                        | 1255.4(4)                                          | 1248.6(4)        | 1253.4(2)                                          | 1754.52(15)                                                 | 2245.0(6)                                                      |
| Crystal size ( $\text{mm}^3$ )                   | 0.22 x 0.15 x 0.1                                  | 0.2 x 0.1 x 0.05 | 0.3 x 0.2 x 0.15                                   | 0.2 x 0.15 x 0.15                                           | 0.2 x 0.15 x 0.15                                              |
| Z                                                | 2                                                  | 2                | 2                                                  | 2                                                           | 2                                                              |
| Density/ $\text{g}\cdot\text{cm}^{-3}$           | 2.537                                              | 2.551            | 2.422                                              | 2.989                                                       | 3.253                                                          |
| $\mu(\text{mm}^{-1})$                            | 11.639                                             | 11.703           | 11.651                                             | 15.752                                                      | 18.112                                                         |
| F (000)                                          | 856                                                | 856              | 808                                                | 1376                                                        | 1896                                                           |
| Completeness to theta                            | 99.1%                                              | 99.9%            | 99.8%                                              | 99.76%                                                      | 99.8%                                                          |
| GOF on $F^2$                                     | 1.204                                              | 1.175            | 1.090                                              | 1.052                                                       | 1.107                                                          |
| Absorption correction                            | Semi-empirical from equivalents                    |                  |                                                    |                                                             |                                                                |
| Extinction coefficient                           | 0.0142(8)                                          | 0.00005(19)      | 0.0033(3)                                          | 0.00075(9)                                                  | 0.00106(7)                                                     |
| Refinement method                                | Full-matrix least-squares on $F^2$                 |                  |                                                    |                                                             |                                                                |
| Data / restraints / parameters                   | 1565/0/95                                          | 4403/0/239       | 4421/0/230                                         | 8472/0/164                                                  | 7904/0/420                                                     |
| $R_1, wR_2$ [ $I > 2\sigma(I)$ ]                 | 0.0328, 0.0899                                     | 0.0525, 0.1418   | 0.0467, 0.1302                                     | 0.0546, 0.1443                                              | 0.0607, 0.1573                                                 |
| $R_1, wR_2$ (all data)                           | 0.0371, 0.1051                                     | 0.0682, 0.1482   | 0.0514, 0.1382                                     | 0.0747, 0.1592                                              | 0.0830, 0.1734                                                 |
| Min/Max $\Delta\rho$ / $\text{e}\text{\AA}^{-3}$ | -1.174/ 2.020                                      | -1.600/3.513     | -1.393/6.894                                       | -1.896/2.705                                                | -1.438/2.354                                                   |
| CCDC                                             | 1815922                                            | 1815926          | 1815923                                            | 1815925                                                     | 1815924                                                        |



## References

- [1] Y. Dang, Y. Liu, Y. Sun, D. Yuan, X. Liu, W. Lu, G. Liu, H. Xia and X. Tao, *CrystEngComm* 2015, **17**, 665.
- [2] W. M. Wendlandt and H. G. Hecht, *Reflectance Spectroscopy*, Interscience, New York, 1966, **62**.
